# Supplementary material for: Nipah Virus Impairs Autocrine IFN Signaling by Sequestering STAT1 and STAT2 into Inclusion Bodies
Source: MDPI journal article supplement (doi:10.3390/v15020554), 2023-02-17
Supplement: s1 [file s1]

## **Nipah virus impairs autocrine IFN signaling by sequestering STAT1 and STAT2 into inclusion bodies**

**Nico Becker, Andrea Maisner \***

Institute of Virology, Philipps University Marburg, Hans-Meerwein-Str. 2, 35043 Marburg, Germany

\* Correspondence: maisner@uni-marburg.de

# **Supplementary Material**

**In order of appearance in the manuscript**

## Supplementary Table 1

Table S1. List of primary and secondary antibodies.

| Primary antibodies  | Source     | Dilution | Provider                           | Catalogue number | Permeabilization after 4% PFA fixation |
|---------------------|------------|----------|------------------------------------|------------------|----------------------------------------|
| anti-NiV N/P (GP3)  | guinea pig | 1:500    | Heinz Feldmann (Hamilton, MT, USA) |                  | 0.1% Triton X-100                      |
| anti-STAT1          | mouse      | 1:50     | Santa Cruz                         | sc-464           | 0.1% Triton X-100                      |
| anti-STAT2          | mouse      | 1:50     | Santa Cruz                         | sc-1668          | 0.1% Triton X-100                      |
| anti-pSTAT1         | rabbit     | 1:100    | Invitrogen                         | MA5-15071        | 100% methanol                          |
| anti-pSTAT2         | rabbit     | 1:50     | Cell Signaling Technology          | 88410            | 100% methanol                          |
| anti-IRF3           | rabbit     | 1:400    | Cell Signaling Technology          | 11904            | 0.1% Triton X-100                      |
| anti-Nf- $\kappa$ B | rabbit     | 1:400    | Cell Signaling Technology          | 8242             | 0.1% Triton X-100                      |

| Secondary antibodies                | Source | Dilution | Provider     | Catalogue number |
|-------------------------------------|--------|----------|--------------|------------------|
| anti-mouse IgG Alexa Fluor 568      | goat   | 1:300    | ThermoFisher | A-11031          |
| anti-rabbit IgG Alexa Fluor 568     | goat   | 1:300    | ThermoFisher | A-11036          |
| anti-guinea pig IgG Alexa Fluor 488 | goat   | 1:300    | ThermoFisher | A-11073          |

## Supplementary Table 2

Table S2. Primer pairs used for qPCR.

| Genes                                    | Primer pairs                 | Primer sequences               | Reference  |
|------------------------------------------|------------------------------|--------------------------------|------------|
| <b>Human <math>\alpha</math>-Tubulin</b> | hu TubA1b forward            | 5'-ACCACCCTGGAGCACTCTGA-3'     | [51]       |
|                                          | hu TubA1b reverse            | 5'-GACAGATGTCATAGATGGCCTCAT-3' |            |
| <b>Human IFN-<math>\beta</math></b>      | hu IFN $\beta$ forward       | 5'-TGCCTCAAGGACAGGATGAAC-3'    | [51]       |
|                                          | hu IFN $\beta$ reverse       | 5'-GGAAGTCTGCAGCTGCTTA-3'      |            |
| <b>Human IFN-<math>\lambda</math>2,3</b> | hu IFN $\lambda$ 2/3 forward | 5'-GCCAAAGATGCCTTAGAAGAG-3'    | [51]       |
|                                          | hu IFN $\lambda$ 2/3 reverse | 5'-CAGAACCTTCAGCGTCAGG-3'      |            |
| <b>Human ISG56</b>                       | hu ISG56 forward             | 5'-CAGCAACCATGAGTACAAAT-3'     | [51]       |
|                                          | hu ISG56 reverse             | 5'-AAGTGACATCTCAATTGCTC-3'     |            |
| <b>Human OAS</b>                         | hu OAS forward               | 5'-GCCCTGGGTCAGTTGACTGG-3'     | [51]       |
|                                          | hu OAS reverse               | 5'-TGAAGCAGGTGGAGAACTCGC-3'    |            |
| <b>Human PKR</b>                         | hu PKR forward               | 5'-ACACTCGTCTCTGAATCATC-3'     | This study |
|                                          | hu PKR reverse               | 5'-GAGACCATTTCATAAGCAACG-3'    |            |
| <b>Human MxA</b>                         | hu MxA forward               | 5'-ATGAGCTAATCACCCCTGGAG-3'    | This study |
|                                          | hu MxA reverse               | 5'-ATACCCAATGTCAGCAGGC-3'      |            |

## Supplementary Figure 1

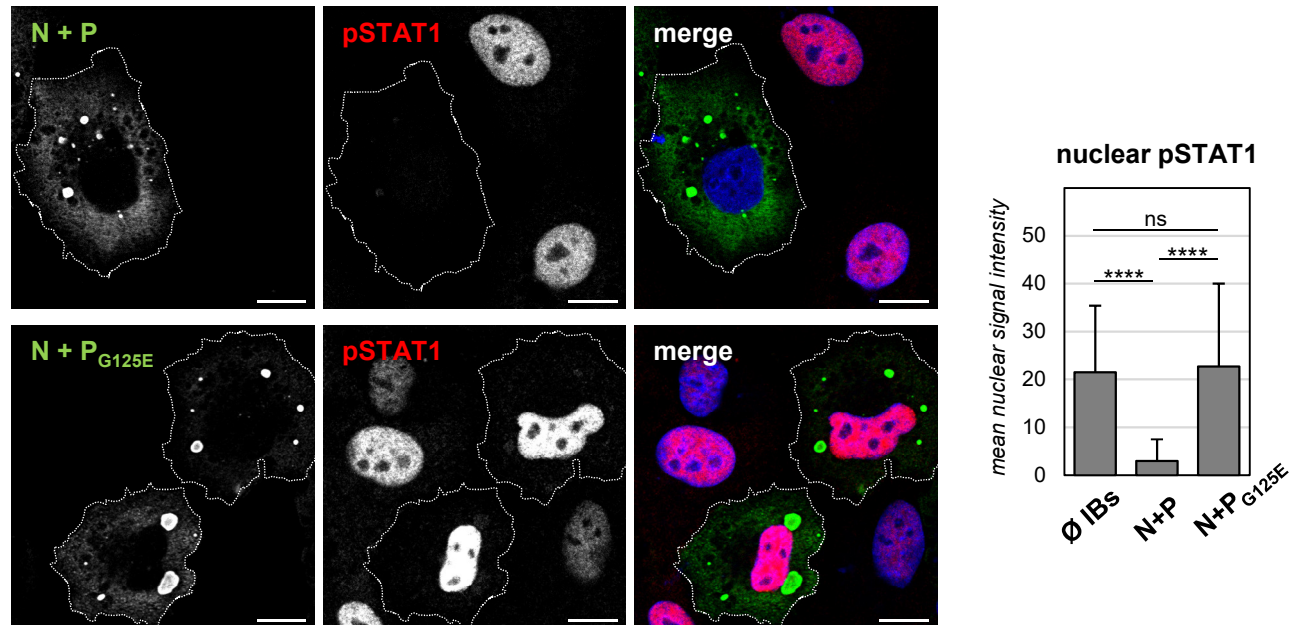

**Figure S1. Wildtype NiV P but not STAT1-binding defective NiV P<sub>G125E</sub> blocks nuclear pSTAT1 accumulation in IFN-treated cells.**

A549 cells were transfected with plasmids encoding NiV N and NiV P (N+P) or NiV N and NiV P<sub>G125E</sub> (N+P<sub>G125E</sub>), a mutant P protein which is known to be STAT1-binding defective [41].

After 22 h, IBs had formed and cells were treated with 1000 U/ml of human IFN- $\beta$  for 40 min and fixed with 4% PFA. After permeabilization with methanol at -20°C, endogenous pSTAT1 was stained with specific antibodies (red). IBs were detected with a NiV N/P specific antiserum (green). Nuclei were counterstained with DAPI (blue). Greyscale single-channel images and colorized merged images are shown. The dashed lines indicate IB-containing cells. Scale bars, 10  $\mu$ m.

**Quantification (right panel):** To quantify the nuclear pSTAT1 fluorescence in IFN-treated cells, the signal intensities of pSTAT1 in the nucleus of cells without IBs (Ø IBs), cells with IBs containing wildtype P (N+P) and cells with IBs containing STAT1-binding defective P<sub>G125E</sub> (N+P<sub>G125E</sub>) were analyzed (> 800 cells in total). The mean nuclear signal intensity of pSTAT1 is shown. Error bars indicate standard deviation (SD); \*\*\*\*,  $p < 0.0001$ ; ns, not significant.
